# Supplementary material
Source: PubMed Central journal article supplement (PMC10287775)
Supplement: 40271_2023_628_MOESM1_ESM.pdf [file 40271_2023_628_MOESM1_ESM.pdf]

## Supplementary file 1. Reference list of reviewed papers

1. Analytis, P., et al., *Physical activity: perceptions of people with severe traumatic brain injury living in the community*. Brain Inj, 2018. 32(2): p. 209-217.
2. Bier, N., E. Dutil, and M. Couture, *Factors affecting leisure participation after a traumatic brain injury: an exploratory study*. J Head Trauma Rehabil, 2009. 24(3): p. 187-94.
3. Buffart, L.M., et al., *Perceived barriers to and facilitators of physical activity in young adults with childhood-onset physical disabilities*. J Rehabil Med, 2009. 41(11): p. 881-5.
4. de Joya, A.L., *Barriers to physical activity following traumatic brain injury: A cognitive mapping study*. 2012, ProQuest Dissertations Publishing.
5. Driver, S., *Development of a conceptual model to predict physical activity participation in adults with brain injuries*. Adapt Phys Activ Q, 2008. 25(4): p. 289-307.
6. Driver, S., et al., *What barriers to physical activity do individuals with a recent brain injury face?* Disabil Health J, 2012. 5(2): p. 117-25.
7. Ellis, R., et al., *Physical activity beliefs and behaviour of adults with physical disabilities*. Disabil Rehabil, 2007. 29(15): p. 1221-7.
8. Hassett, L.M., et al., *Injury severity, age and pre-injury exercise history predict adherence to a home-based exercise programme in adults with traumatic brain injury*. Brain Inj, 2011. 25(7-8): p. 698-706.
9. Lorenz, L.S., et al., *Healthy body, healthy mind: A mixed methods study of outcomes, barriers and supports for exercise by people who have chronic moderate-to-severe acquired brain injury*. Disability and Health Journal, 2018. 11(1): p. 70-78.
10. Pinto, S.M., M.A. Newman, and M.A. Hirsch, *Perceived Barriers to Exercise in Adults with Traumatic Brain Injury Vary by Age*. J Funct Morphol Kinesiol, 2018. 3(3).
11. Quilico, E.L., et al., *Interpretative Phenomenological Analysis of Community Exercise Experiences after Severe Traumatic Brain Injury*. Qualitative Research in Sport, Exercise and Health, 2021. 13(5): p. 800-815.
12. Reavenall, S. and H. Blake, *Determinants of physical activity participation following traumatic brain injury*. International Journal of Therapy and Rehabilitation, 2010. 17(7): p. 360-369.
13. Self, M., et al., *Physical Activity Experiences of Individuals Living With a Traumatic Brain Injury: A Qualitative Research Exploration*. Adapted Physical Activity Quarterly, 2013. 30(1): p. 20-39.
14. Törnbohm, K., K.S. Sunnerhagen, and A. Danielsson, *Perceptions of physical activity and walking in an early stage after stroke or acquired brain injury*. PLoS One, 2017. 12(3): p. e0173463.
15. Wise, E.K., et al., *Benefits of Exercise Maintenance After Traumatic Brain Injury*. Archives of Physical Medicine and Rehabilitation, 2012. 93(8): p. 1319-1323.
