# Supplementary material
Source: PubMed Central journal article supplement (PMC10287775)
Supplement: 40271_2023_628_MOESM2_ESM.pdf [file 40271_2023_628_MOESM2_ESM.pdf]

DCE focus groups – stage three – attribute and level refinement

| Initial attributes                                                                                    | Initial levels                                                                                                                                                                                                                   | Views of FG1<br>(4.7.22) | Views of FG2<br>(5.7.22) | Views of FG3<br>(5.7.22) | Views of FG4<br>(11.7.22) | Proposed refined attributes | Proposed refined levels |
|-------------------------------------------------------------------------------------------------------|----------------------------------------------------------------------------------------------------------------------------------------------------------------------------------------------------------------------------------|--------------------------|--------------------------|--------------------------|---------------------------|-----------------------------|-------------------------|
| <ul style="list-style-type: none"> <li>Type of physical activity</li> </ul>                           | <ul style="list-style-type: none"> <li>Competitive sport</li> <li>Active/Physical recreation</li> <li>Walking or wheeling program</li> <li>Exercise program</li> </ul>                                                           |                          |                          |                          |                           |                             |                         |
| <ul style="list-style-type: none"> <li>Your out-of-pocket cost</li> </ul>                             | <ul style="list-style-type: none"> <li>\$0</li> <li>\$10</li> <li>\$25</li> <li>\$50</li> </ul>                                                                                                                                  |                          |                          |                          |                           |                             |                         |
| <ul style="list-style-type: none"> <li>Travel time</li> </ul>                                         | <ul style="list-style-type: none"> <li>&lt;5 minutes each way</li> <li>5 to 29 minutes each way</li> <li>30 to 60 minutes each way</li> <li>&gt;60 minutes each way</li> </ul>                                                   |                          |                          |                          |                           |                             |                         |
| <ul style="list-style-type: none"> <li>Who else is doing the activity?</li> </ul>                     | <ul style="list-style-type: none"> <li>People with similar disability</li> <li>People with any type of disability</li> <li>People with and without disability</li> <li>Mainly people without disability</li> </ul>               |                          |                          |                          |                           |                             |                         |
| <ul style="list-style-type: none"> <li>Skills/knowledge of the activity leader/facilitator</li> </ul> | <ul style="list-style-type: none"> <li>Motivates me to do the activity</li> <li>Has specialist knowledge of the activity</li> <li>Has general knowledge about disability</li> <li>Understands my injury and abilities</li> </ul> |                          |                          |                          |                           |                             |                         |
| <ul style="list-style-type: none"> <li>Accessibility of the environment /setting</li> </ul>           | <ul style="list-style-type: none"> <li>Tailored to meet my needs</li> <li>Provided for any disability type</li> <li>Accessibility is manageable, but not ideal</li> </ul>                                                        |                          |                          |                          |                           |                             |                         |
| <ul style="list-style-type: none"> <li>Benefits of doing the activity</li> </ul>                      | <ul style="list-style-type: none"> <li>Physical</li> <li>Mood</li> <li>Cognition</li> <li>Social</li> <li>Personal achievement</li> <li>Feel “normal” or “not injured”</li> </ul>                                                |                          |                          |                          |                           |                             |                         |
| <ul style="list-style-type: none"> <li>Effect on your wellbeing</li> </ul>                            | <ul style="list-style-type: none"> <li>no improvement</li> <li>small improvement</li> <li>moderate improvement</li> <li>large improvement</li> </ul>                                                                             |                          |                          |                          |                           |                             |                         |
